# Supplementary material for: Long-Term Destiny of Corneal Endothelial Cells in Anterior Chamber Intraocular Lens-Implanted Eyes
Source: Hindawi journal article supplement (doi:10.1155/2020/5967509), 2020-12-24
Supplement: f1 [file 5967509.f1.pdf]

| 编号 | 性别 | age | 访问时间 | mon | 眼别 | 眼别 | AL    |
|----|----|-----|------|-----|----|----|-------|
| 1  |    | 1   | 64   | 8   | R  | 1  | 23.87 |
| 2  |    | 2   | 42   | 15  | L  | 2  | 34.53 |
| 3  |    | 2   | 42   | 15  | R  | 1  | 35.67 |
| 5  |    | 1   | 51   | 12  | L  | 2  | 22.19 |
| 4  |    | 1   | 51   | 12  | R  | 1  | 22.34 |
| 6  |    | 1   | 52   | 11  | R  | 1  | 25.39 |
| 7  |    | 1   | 61   | 8   | R  | 1  | 22.86 |
| 8  |    | 1   | 22   | 9   | R  | 1  | 26.63 |
| 9  |    | 1   | 40   | 20  | L  | 2  | 25.7  |
| 10 |    | 2   | 42   | 12  | R  | 1  | 32.06 |
| 11 |    | 2   | 41   | 13  | L  | 2  | 34.48 |
| 12 |    | 2   | 41   | 13  | R  | 1  | 34.57 |
| 13 |    | 1   | 27   | 11  | L  | 2  | 32.56 |
| 14 |    | 1   | 27   | 11  | R  | 1  | 33.32 |
| 15 |    | 1   | 67   | 9   | R  | 1  | 26.49 |
| 16 |    | 2   | 49   | 12  | R  | 1  |       |
| 17 |    | 1   | 17   | 9   | L  | 2  | 28.56 |
| 18 |    | 1   | 17   | 9   | R  | 1  | 28.71 |
| 19 |    | 1   | 63   | 2   | R  | 1  | 24.05 |
| 20 |    | 1   | 21   | 12  | L  | 2  | 25.56 |
| 21 |    | 1   | 21   | 12  | R  | 1  | 24.54 |
| 22 |    | 2   | 64   | 18  | L  | 2  | 30.68 |
| 23 |    | 2   | 64   | 18  | R  | 1  | 28.41 |
| 24 |    | 1   | 38   | 14  | L  | 2  | 25.02 |
| 25 |    | 2   | 20   | 17  | R  | 1  | 27.75 |
| 26 |    | 2   | 65   | 17  | L  | 2  | 28.4  |
| 27 |    | 2   | 65   | 17  | R  | 1  | 28.61 |
| 28 |    | 2   | 40   | 11  | L  | 2  | 28.82 |
| 29 |    | 2   | 40   | 11  | R  | 1  | 29.44 |
| 30 |    | 2   | 48   | 6   | R  | 1  | 34.64 |
| 31 |    | 2   | 48   | 6   | L  | 2  | 33.81 |
| 32 |    | 1   | 40   | 23  | L  | 2  |       |
| 33 |    | 1   | 14   | 9   | L  | 2  | 29.56 |
| 34 |    | 1   | 14   | 9   | R  | 1  | 28.85 |
| 35 |    | 2   | 13   | 8   | R  | 1  | 32.21 |
| 36 |    | 2   | 13   | 8   | L  | 2  | 32.86 |
| 37 |    | 2   | 34   | 17  | L  | 2  |       |

|      | ACD  | 是否取出手;植入-取出间 | IOL | 眼内植入失代偿时间 | 是否发生内 |
|------|------|--------------|-----|-----------|-------|
|      | 3.49 | 1            | 3.5 | 3.5       | 2     |
|      | 4.47 | 1            | 11  | 11        | 11    |
|      | 4.61 | 1            | 11  | 11        | 11    |
|      | 3.48 | 1            | 4   | 4         | 4     |
|      | 3.21 | 2            |     | 12        |       |
|      | 3.59 | 1            | 3   | 3         | 3     |
|      | 3.5  | 1            | 6   | 6         | 6     |
|      | 3.67 | 1            | 5   | 5         | 5     |
|      | 3.4  | 1            | 18  | 18        | 18    |
|      | 3.08 | 1            | 9   | 9         | 9     |
|      | 3.51 | 1            | 12  | 12        |       |
|      | 3.64 | 1            | 12  | 12        |       |
|      |      | 1            | 10  | 10        |       |
|      |      | 1            | 10  | 10        |       |
|      | 3.45 | 1            | 8   | 8         | 8     |
| 3.18 |      | 1            | 11  | 11        |       |
|      | 3.83 | 1            | 8   | 8         |       |
|      | 3.61 | 1            | 8   | 8         |       |
|      | 4    | 1            | 2   | 2         |       |
|      | 3.32 | 1            | 9   | 9         |       |
|      | 3.21 | 1            | 9   | 9         | 9     |
|      |      | 1            | 10  | 10        | 10    |
|      |      | 1            | 9   | 9         | 9     |
|      | 3.52 | 1            | 6   | 6         | 6     |
|      | 3.52 | 1            | 10  | 10        | 10    |
|      | 3.75 | 1            | 15  | 15        | 15    |
|      | 3.45 | 1            | 15  | 15        |       |
|      | 3.13 | 1            | 9   | 9         | 9     |
|      | 3.13 | 1            | 9   | 9         |       |
|      | 3.36 | 1            | 4   | 4         |       |
|      | 3.38 | 2            |     | 6         |       |
| 3.97 |      | 1            | 23  | 23        | 23    |
|      | 3.12 | 1            | 7   | 7         |       |
|      | 3    | 1            | 7   | 7         |       |
|      | 3.86 | 2            |     | 8         |       |
|      | 3.84 | 1            | 8   | 8         |       |
| 3.41 |      | 1            | 17  | 17        | 17    |

| 角膜移植 | AC-IOL脱位 | 角膜水肿/混浊 | 取出前青光眼 | 取出前葡萄膜炎 | 术前角膜内皮    | 术前CV |
|------|----------|---------|--------|---------|-----------|------|
|      | 1        | 1       | 2      | 1       | 2524      | 47   |
| 1    | 1        | 1       | 2      | 2       | N/A       |      |
| 1    | 1        | 1       | 2      | 1       | N/A       |      |
| 2    | 1        | 1       | 2      | 2       | N/A       |      |
|      | 1        |         | 2      | 2       | 2546      | 34   |
| 1    | 2        | 1       | 2      | 2       | 2586      | 缺    |
| 1    | 1        | 1       | 2      | 2       | 2624      | 32   |
| 2    | 2        | 1       | 2      | 2       | N/A       |      |
| 2    | 2        | 1       | 2      | 2       | N/A       |      |
| 1    | 2        | 1       | 2      | 2       | N/A       |      |
|      | 2        | 2       | 2      | 2       | 2976      | 40   |
|      | 2        | 2       | 2      | 2       | 2915      | 47   |
|      | 2        | 2       | 1      | 2       | 2944      | 38   |
|      | 2        | 2       | 1      | 2       | 2609      | 30   |
| 1    | 2        | 1       | 2      | 2       | N/A       |      |
|      | 2        |         | 2      | 2       | 2512      | 40   |
|      | 2        | 2       | 2      | 2       | 3133      | 50   |
|      | 1        | 2       | 2      | 2       | 2900      | 50   |
|      | 1        | 2       | 2      | 2       | 2500      | 34   |
|      | 2        | 1       | 2      | 2       | 2562      | 32   |
| 2    | 1        | 1       | 2      | 2       | N/A       |      |
| 1    | 2        | 1       | 2      | 2       | N/A       |      |
| 1    | 1        | 1       | 2      | 2       | N/A       |      |
| 1    | 1        | 1       | 2      | 1       | N/A       |      |
| 1    | 2        | 1       | 2      | 2       | 3546      | 13   |
| 2    | 2        | 1       | 2      | 2       | N/A       |      |
|      | 2        | 2       | 2      | 2       | 3196      | 36   |
| 1    | 1        | 1       | 2      | 2       | 2649      |      |
|      | 1        | 2       | 2      | 2       | 2581      | 35   |
|      | 2        | 2       | 2      | 2       | 2494      | 36   |
|      | 2        | 2       | 2      | 2       | 3194      | 35   |
| 2    | 2        | 1       | 2      | 2       | 2334(对侧眼) | 31   |
|      | 2        | 2       | 2      | 2       | 3437      | 14   |
|      | 2        | 2       | 2      | 2       | 3019      | 10   |
|      | 2        | 2       | 2      | 2       | 3204      | 39   |
|      | 1        | 2       | 2      | 2       | 2776      | 61   |
| 2    | 2        | 1       | 2      | 2       |           |      |

| 术前6A | 术前CCT | 随访视力BC | 随访角膜内皮 | 随访CV | 随访6A | 随访CCT |
|------|-------|--------|--------|------|------|-------|
| 57   | 560   | 0.8    | 2194   | 42   | 42   | 592   |
|      |       | 0.2    | 2059   | 35   | 29   | 670   |
|      |       | 0.1    | 1364   | 64   | 15   | 647   |
| 57   | 495   | 0.4    | 1575   | 33   | 47   | 487   |
| 缺    | 缺     |        |        |      |      |       |
| 缺    | 564   |        |        |      |      |       |
|      |       | 0.4    |        |      |      |       |
| 47   | 587   | 0.4    | 1492   | 35   | 43   | 514   |
| 44   | 559   | 0.7    | 1690   | 50   | 33   | 504   |
| 58   | 548   | 0.2    | 1817   | 30.6 | 50   | 512   |
| 64   | 548   | 0.3    | 1146   | 30.4 | 47   | 488   |
| 45   | 459   | 0.4    | 1523   | 61   | 33   | 511   |
| 45   | 490   | 0.7    | 1523   | 61   | 33   | 511   |
| 48   | 511   | 1      | 1746   | 47   | 33   | 627   |
| 54   | 526   | 0.15   | 2691   | 47   | 46   | 626   |
| 56   | 570   | 0.08   | 2180   | 47   | 39   | 610   |
| 28   | 574   |        |        |      |      |       |
| 38   | 548   | 0.6    | 2799   | 46   | 35   | 556   |
| 52   | 531   | 0.8    | 1652   | 37   | 45   | 560   |
| 35   | 548   | 0.5    | 1503   | 39   | 25   | 550   |
| 64   | 520   | 0.6    | 2890   | 34   | 61   | 529   |
| 58   | 537   |        |        |      |      |       |
| 50   | 511   | 0.8    | 2194   | 42   | 42   | 592   |
| 50   | 530   | 0.9    | 1965   | 47   | 45   | 573   |
| 57   | 530   | 0.3    | 3120   | 41   | 51   | 549   |
| 52   | 537   | 1      | 2596   | 37   | 58   | 563   |

| 随访时并发症 | NCT  |
|--------|------|
| 无      | 17   |
| 无      | 12   |
| 无      | 10   |
| 无      | 12.3 |
| 无      | 15   |
| 无      | 17   |
| 无      |      |
| 无      |      |
| 无      | 17   |
| 无      | 15   |
| 无      | 18   |
| 无      | 19   |
| 无      |      |
| 无      |      |
| 无      |      |
| 无      | 21   |
| 无      | 23   |
| 无      | 17   |
| 无      | 18   |
|        | 15   |
| 眼红, 眼部 | 11.6 |
